# Supplementary material
Source: PubMed Central journal article supplement (PMC8054065)
Supplement: NIHMS1689071-supplement-1.pdf [file NIHMS1689071-supplement-1.pdf]

**Supplemental Table 1. Distribution of Prolonged SED and Activity Trajectories across SED Trajectories among Women in the MoM Health Study**

|                                 | Overall<br>(n=105) | Low SED<br>(n=20) | Medium SED<br>(n=42) | High SED<br>(n=43) | p-value |
|---------------------------------|--------------------|-------------------|----------------------|--------------------|---------|
| <b>Prolonged SED Trajectory</b> |                    |                   |                      |                    |         |
| Low                             | 18 (17%)           | 11 (55%)          | 7 (17%)              | 0 (0%)             | <0.001  |
| Medium                          | 58 (55%)           | 9 (45%)           | 32 (75%)             | 17 (40%)           |         |
| High                            | 29 (28%)           | 0 (0%)            | 3 (7%)               | 26 (60%)           |         |
| <b>Standing Trajectory</b>      |                    |                   |                      |                    |         |
| Low                             | 39 (37%)           | 0 (0%)            | 2 (5%)               | 37 (86%)           | <0.001  |
| Medium                          | 47 (45%)           | 3 (15%)           | 38 (90%)             | 6 (14%)            |         |
| High                            | 19 (28%)           | 17 (85%)          | 2 (5%)               | 0 (0%)             |         |
| <b>Stepping Trajectory</b>      |                    |                   |                      |                    |         |
| Low                             | 19 (18%)           | 0 (0%)            | 1 (2%)               | 18 (42%)           | <0.001  |
| Medium                          | 45 (61%)           | 7 (35%)           | 16 (38%)             | 22 (51%)           |         |
| High                            | 41 (39%)           | 13 (65%)          | 25 (60%)             | 3 (7%)             |         |
| <b>Steps/day Trajectory</b>     |                    |                   |                      |                    |         |
| Low                             | 36 (34%)           | 3 (15%)           | 6 (15%)              | 27 (63%)           | <0.001  |
| Medium                          | 47 (45%)           | 11 (55%)          | 24 (57%)             | 12 (28%)           |         |
| High                            | 22 (21%)           | 6 (30%)           | 12 (29%)             | 4 (9%)             |         |
| <b>MVPA Trajectory</b>          |                    |                   |                      |                    |         |
| Low                             | 25 (24%)           | 2 (10%)           | 9 (22%)              | 14 (34%)           | 0.330   |
| Medium                          | 53 (52%)           | 13 (65%)          | 22 (54%)             | 18 (44%)           |         |
| High                            | 24 (24%)           | 5 (25%)           | 10 (24%)             | 9 (22%)            |         |
| <b>Bouted MVPA Trajectory</b>   |                    |                   |                      |                    |         |
| Low                             | 74 (73%)           | 15 (75%)          | 29 (71%)             | 30 (73%)           | 0.999   |
| High                            | 28 (27%)           | 5 (25%)           | 12 (29%)             | 11 (27%)           |         |

Data presented as as n (%)

Abbreviations: MVPA, moderate-to-vigorous intensity physical activity; SED, sedentary behavior

**Supplemental Table 2. APO and Excessive GWG by Trajectory Groups among Women in the MoM Health Study**

|                                                 | Overall | APO<br>(rate) | p-<br>value | Hypertensive<br>Disorders of<br>Pregnancy (rate) | p-<br>value | Excessive<br>GWG (rate) | p-<br>value |
|-------------------------------------------------|---------|---------------|-------------|--------------------------------------------------|-------------|-------------------------|-------------|
| <b>SED Trajectory<br/>(n=100)</b>               |         |               |             |                                                  |             |                         |             |
| Low                                             | 20      | 2 (0.10)      | 0.037       | 2 (0.10)                                         | 0.011       | 12 (0.60)               | 0.388       |
| Medium                                          | 39      | 4 (0.10)      |             | 1 (0.03)                                         |             | 20 (0.50)               |             |
| High                                            | 41      | 13 (0.32)     |             | 10 (0.24)                                        |             | 17 (0.44)               |             |
| <b>Prolonged SED<br/>Trajectory<br/>(n=100)</b> |         |               |             |                                                  |             |                         |             |
| Low                                             | 17      | 0 (0.00)      | 0.062       | 0 (0.00)                                         | 0.195       | 9 (0.53)                | 0.268       |
| Medium                                          | 55      | 12 (0.22)     |             | 8 (0.15)                                         |             | 30 (0.55)               |             |
| High                                            | 28      | 7 (0.25)      |             | 5 (0.18)                                         |             | 10 (0.37)               |             |
| <b>Standing<br/>Trajectory<br/>(n=100)</b>      |         |               |             |                                                  |             |                         |             |
| Low                                             | 37      | 11 (0.30)     | 0.127       | 9 (0.24)                                         | 0.029       | 14 (0.40)               | 0.107       |
| Medium                                          | 44      | 6 (0.14)      |             | 2 (0.05)                                         |             | 22 (0.49)               |             |
| High                                            | 19      | 2 (0.11)      |             | 2 (0.11)                                         |             | 13 (0.68)               |             |
| <b>Stepping<br/>Trajectory<br/>(n=100)</b>      |         |               |             |                                                  |             |                         |             |
| Low                                             | 19      | 6 (0.32)      | 0.048       | 4 (0.21)                                         | 0.028       | 11 (0.58)               | 0.588       |
| Medium                                          | 42      | 10 (0.24)     |             | 8 (0.19)                                         |             | 21 (0.51)               |             |
| High                                            | 39      | 3 (0.08)      |             | 1 (0.03)                                         |             | 17 (0.44)               |             |
| <b>Steps/day<br/>Trajectory</b>                 |         |               |             |                                                  |             |                         |             |

Sedentary Behavior across Pregnancy

|                                                |    |           |       |          |       |           |       |
|------------------------------------------------|----|-----------|-------|----------|-------|-----------|-------|
| <b>(n=100)</b>                                 |    |           |       |          |       |           |       |
| Low                                            | 34 | 11 (0.32) | 0.056 | 8 (0.24) | 0.106 | 19 (0.54) | 0.057 |
| Medium                                         | 46 | 5 (0.11)  |       | 4 (0.09) |       | 25 (0.57) |       |
| High                                           | 20 | 3 (0.15)  |       | 1 (0.05) |       | 5 (0.25)  |       |
| <b>MVPA Trajectory</b><br><b>(n=97)</b>        |    |           |       |          |       |           |       |
| Low                                            | 24 | 4 (0.17)  | 1.000 | 2 (0.08) | 0.845 | 11 (0.46) | 0.348 |
| Medium                                         | 51 | 10 (0.20) |       | 7 (0.14) |       | 28 (0.56) |       |
| High                                           | 22 | 4 (1.18)  |       | 3 (0.14) |       | 8 (0.36)  |       |
| <b>Bouted MVPA</b><br><b>Trajectory (n=97)</b> |    |           |       |          |       |           |       |
| Low                                            | 71 | 12 (0.17) | 0.764 | 8 (0.11) | 0.728 | 38 (0.54) | 0.114 |
| High                                           | 26 | 6 (0.23)  |       | 4 (0.15) |       | 9 (0.35)  |       |

Abbreviations: APO, adverse pregnancy outcomes; GWG, gestational weight gain; MVPA, moderate-to-vigorous intensity physical activity; OR, odds ratio; SED, sedentary behavior
